1  
2 **Key role of auxin cellular accumulation in totipotency and**  
3 **pluripotency acquisition**

4  
5 **Omid Karami<sup>1</sup>, Azadeh Khadem<sup>1</sup>, Arezoo Rahimi and Remko Offringa<sup>1</sup>**  
6

7 <sup>1</sup>Plant Developmental Genetics, Institute of Biology Leiden, Leiden University, Sylviusweg 72, 2333 BE Leiden, Netherlands  
8  
9

10 **Summary**

11 Genome editing and *in vitro* based-plant propagation require efficient plant regeneration system. Somatic  
12 embryogenesis (SE) or de novo shoot regeneration are two major systems that widely used for plant *in vitro*  
13 regeneration. Most SE or shoot regeneration protocols rely on the exogenous application of the synthetic auxin  
14 analog 2,4-dichlorophenoxyacetic acid (2,4-D) and naphthylene acetic acid (NAA), whereas the natural auxins  
15 indole-3-acetic acid (IAA), 4-chloroindole-3-acetic acid (4-Cl-IAA) or indole-3-butyric acid (IBA) are not or less  
16 effective for plant regeneration. Although these synthetic auxins mimics the physiological activity of the main  
17 natural auxin IAA in many aspects, there are also clear differences that have been attributed to differences in  
18 stability or to different affinities for certain TIR1/AFB-Aux/IAA auxin co-receptor pairs. Here we show that the  
19 success of 2,4-D in inducing SE from Arabidopsis is related to ineffectiveness as substrate for auxin efflux,  
20 resulting in its intracellular 2,4-D accumulation. Reducing auxin efflux by addition of the auxin transport inhibitor  
21 naphthylphthalamic acid (NPA) also allowed natural auxins and other synthetic analogs to induce SE in Arabidopsis  
22 with similar efficiencies as 2,4-D. The PIN-FORMED auxin efflux carriers PIN1, PIN2 and the ATP-binding  
23 cassette-B auxin transporters ABCB1 and ABCB19 were shown to be partially responsible for the efflux of natural  
24 auxins during SE induction. Importantly, all somatic embryos induced in Arabidopsis by IAA in the presence of  
25 NPA showed a normal embryo to seedling conversion and subsequent plant development, whereas for the 2,4-D  
26 system this was limited to 50-60% of the embryos. We showed that the auxin transport inhibition promotes de novo  
27 shoot regeneration capacity from callus induced by 4-Cl-IAA in *Brassica napus*. In addition, we observed a obvious  
28 acceleration in shoot bud emerging from callus induced by 4-Cl-IAA than 2,4-D. Based on our data we conclude,  
29 that the efficiency of plant propagation can be significantly improved by applying the natural auxins in the presence  
30 of the auxin transport inhibitor NPA.  
31

## 32 Introduction

33 In plant, the plant hormone auxin acts as a master regulator of a wide range of cellular functions. The role of auxin  
34 in cellular processes is mainly associated with the level of auxin in plant cells which is determined by de novo auxin  
35 biosynthesis, auxin metabolism, auxin homeostasis, and auxin transport (Vanneste and Friml, 2009; Paque and  
36 Weijers, 2016).

37 The auxin is synthesized in all plant cells, but after its biosynthesis in certain cells or tissues, mostly in young  
38 developing organs, is transported to sink tissues via the phloem or cell-to-cell transport. A network of auxin influx  
39 and efflux plasma membrane-localized proteins transport auxin between cells uniquely in the directional manner is  
40 termed polar auxin transport (PAT) (Friml, 2010; Adamowski and Friml, 2015). Three classes of auxin carriers  
41 including PIN-FORMED (PIN) proteins (Friml, 2003), ATP-binding cassette-B (ABCB)/P-glycoprotein (PGP)  
42 proteins (Geisler *et al.*, 2017), AUXIN1/LIKE-AUX1 (AUX/LAX) family members (Péret *et al.*, 2012), have been  
43 discovered that are responsible for the directionality of auxin flow.

44 Base on function and subcellular localization, the PIN proteins are categorized into two groups. The first PIN1-type  
45 proteins are auxin efflux carriers that are asymmetrically localized at the plasma membrane and export auxin to the  
46 neighboring cell in polar fashion. Expression pattern, dynamics of polar subcellular localization, and abundance of  
47 plasma membrane localization of this group of PIN proteins play important role in direction of auxin export and  
48 regulation of auxin gradients (Robert *et al.*, 2013; Adamowski and Friml, 2015; Rakusová *et al.*, 2016). The second  
49 group of PIN proteins that are localized in the endoplasmic reticulum and the nuclear membrane regulate the  
50 movement of auxin from the cytoplasm into the lumen of the endoplasmic reticulum and into the nuclear (Mravec *et*  
51 *al.*, 2009; Ganguly *et al.*, 2010). Second class of auxin transporters are ABCB proteins that facilitate both auxin  
52 influx and efflux auxin transport (Geisler *et al.*, 2017). ABCB proteins transport auxin against steep auxin gradient,  
53 as some ABCB/PGP proteins import auxin into the cytoplasm cells when auxin is low, but they usually export auxin  
54 in high auxin level cells (Yang and Murphy, 2009). Although ABCB are not distributed in at the plasma membrane  
55 in a polar fashion (Geisler and Murphy, 2006), by forming complexes with the PINs enhance PAT (Blakeslee *et al.*,  
56 2007). The third class of auxin transporters are AUX/LAX proteins that mediate auxin import into the cytoplasm  
57 and depends on the cell or the tissue are localization at the plasma membrane either non-polar or polar fashion (Péret  
58 *et al.*, 2012; Swarup and Bhosale, 2019). The cellular level of auxin and the direction of auxin flow are determined  
59 by the combined activities of the PINs, ABCB, and AUX/LAX transporters (Kierzkowski *et al.*, 2013).

60 In auxin research, the synthetic auxin transport inhibitors has been extensively used as tools to understand the role  
61 of auxin transport in cellular functions. Several auxin transport inhibitors have been characterized so far, but  
62 naphthylphthalamic acid (NPA) is the most commonly auxin efflux transport inhibitor used in the auxin researches  
63 (Teale and Palme, 2018). Although the exact mode of NPA is unclear, NPA-mediated auxin transport inhibition  
64 could associated with its direct interaction with PNA or ABCB transporters.

65 The capacity regeneration of plants from explants is a major importance for or biotechnological breeding such as  
66 plant propagation of elite cultivars and genetic engineering. Applying the exogenous auxin in plant tissue culture  
67 systems is a critical factor for plant regeneration. The natural auxin indole-3-acetic acid (IAA) or the other natural  
68 auxin such as 4-chloroindole-3-acetic acid (4-Cl-IAA), ndole-3-butyric acid (IBA) and phenylacetic acid (PAA) are  
69 less effective for *in vitro* plant regeneration in compared with synthetic auxins such as 2,4-dichlorophenoxyacetic  
70 acid (2,4-D) and naphthylene acetic acid (NAA). Among synthetic auxins, 2,4-D is the most effective auxin that is  
71 commonly used for plant *in vitro* regeneration. However, it remains unclear, why 2,4-D is more efficient compared  
72 to other auxin analogs. Although 2,4-D mimics the auxin activity of IAA at the molecular level (auxin signaling)  
73 (Pufky *et al.*, 2003; Tan *et al.*, 2007), in contrast to a rapid reduction IAA level via conjugation and degradation  
74 mechanisms in plant cells, 2,4-D is more stable (Eyer *et al.*, 2016). In addition, 2,4-D is less efficient substrate for  
75 PIN and ABCB transports, which this leads a significant accumulation of 2,4-D than IAA in plant cells (Yang and  
76 Murphy, 2009). Thus, the stability or accumulation of 2,4-D can be considered as possibility why 2,4-D is more  
77 efficient for *in vitro* regeneration compared to other auxin analogs.

78 In this research, we found that less effective of natural auxins for regeneration is highly associated with their low  
79 accumulation in plant cells due to cell-to-cell transport. We showed that reducing auxin efflux by addition of the

80 auxin transport inhibitor NPA allowed natural auxins and other synthetic analogs to induce SE or improve de novo  
81 shoot regeneration capacity. These our findings can be develop into effective protocols for plant regeneration.

82  
83

## 84 **Result and discussion**

### 85 **Enhancement of SE capacity by auxin transport inhibition**

86 SE is a process in which in plant somatic cells are reprogrammed to embryonic cells that subsequently develop into  
87 embryos. Many SE protocols rely on the exogenous application of the synthetic auxin analog 2,4-D, whereas the  
88 IAA, 4-Cl-IAA or IBA are not or less effective in plant regeneration. In view of high intercellular accumulation of  
89 2,4-D compared to IAA, we hypothesized that the low accumulation of IAA in plant cells might associated with its  
90 disability in inducing SE. In Arabidopsis, immature zygotic embryos (IZEs) are the most competent tissues  
91 for SE in response to the 2,4-D (Gaj, 2001). To test our hypothesis, we examined the effect of IAA  
92 accumulation on inducing embryonic callus from Arabidopsis IZEs explants by addition of auxin transport inhibitor  
93 NPA to embryonic cultures. Interestingly, we found that addition of NPA to medium allows IAA to induce SE with  
94 similar efficiencies as 2,4-D (Fig. 1A,B), whereas IZEs incubated with IAA without NPA or NPA without IAA  
95 only produced a few embryos (Fig. 1A,B). These results indicate that the less effective of IAA in inducing SE is  
96 associated with its low accumulation due to high transport dynamic in plant cells.

97 To determine the impact of different level of auxin accumulation on SE, we examined the effect of different NPA  
98 concentrations (2, 5, 10, 20, 40 and 100  $\mu$ M) or at present 4  $\mu$ M IAA or different IAA concentrations (0.5, 1.5, 3,  
99 4.5, 10 and 15  $\mu$ M) at present of 10  $\mu$ M NPA on SE. The results showed that low and high level of NPA or IAA  
100 treatments resulted in a significant reduction in the number of somatic embryos (Supplementary fig. 1A and B). To  
101 further confirm the relationship between auxin accumulation level and SE, we also analyzed the effect different  
102 concentrations of 2,4-D (0.1, 0.5, 1, 2, 5 and 10  $\mu$ M) at present of 10  $\mu$ M NPA on SE. The NPA treatment promotes  
103 the number of embryos at low 2,4-D concentrations (0.1, 0.5, 1, 2  $\mu$ M) (Supplementary fig. 1C), whereas reduced  
104 the number of embryo at higher concentrations of 2,4-D (5, 10  $\mu$ M). Together, these results indicates that the  
105 increase in the auxin accumulation promotes SE until a certain level and above of this level negatively influences  
106 SE.

107 To determine whether NPA treatment can promotes SE in the other natural and synthetic auxins, we analyzed the  
108 effect of NPA on capacity of SE in three other natural auxins (4-CL-IAA, IBA, PA) and two other synthetic auxins  
109 (picloram and dicamba). Intestinally, NPA treatment strongly enhanced the capacity of somatic embryo induction by  
110 4-CL-IAA, IBA, PA (Fig. 1C,D), picloram and dicamba (Fig. 1C,E). These results indicate that the less effective of  
111 these natural and synthetic auxins in inducing of SE also contribute to their intracellular accumulation.

112 To examine the effect of NPA on natural or synthetic auxins-induced response at IZE explants, we employed the  
113 auxin-responsive *DR5:GUS* reporter that extensively used to visualize auxin response in Arabidopsis tissues. As  
114 expected, NPA treatment results in a relative activity *DR5:GUS* at IZE cotyledon tissues. By contrast NPA highly  
115 led to a strong *DR5:GUS* activity at present IAA, picloram, and dicamba with similar 2,4-D (Fig. 1F). These results  
116 indicate that transport inhibition of exogenesis applied natural or synthetic auxins by NPA leads their intracellular  
117 accumulation and subsequently a strong auxin response which is required for promoting SE.

118

### 119 **PIN- and ABCB-mediated auxin efflux reduces the capacity of IAA to induce SE**

120 Auxin efflux is mainly facilitated by polar localization of PIN proteins on the plasma membrane. To show whether  
121 PIN carries are responsible for low efficiency of IAA-induced SE, first we examined the expression of *PIN1:PIN1-*  
122 *GFP*, *PIN2:PIN2-VENUS*, *PIN3:PIN3-GFP*, *PIN4:PIN4-GFP*, and *PIN7:PIN7-GFP* reporters in IZEs treated with  
123 IAA and IAA/NPA. Of these reporters, only *PIN1-GFP* and *PIN2-VENUS* expression was detected in IZE  
124 cotyledon tissues (Fig. 2A, B). In two-and five-day-old IZE explants, *PIN1-GFP* signals was not detected in IZE  
125 cotyledon tissues (Fig. 2A), while *PIN2-VENUS* signals was detected at the abaxial side of the cotyledons IZEs (Fig.  
126 2B). The earliest *PIN1-GFP* signals was detected at the abaxial side of the cotyledons at 7 days of cultures (Fig.  
127 2A), while *PIN2-VENUS* significantly decreased in cotyledons (Fig. 2B). These results indicate *PIN1* and *PIN2* are

128 likely responsible IAA depletion in the cotyledon epidermal cells. We did not observed the polar localization of  
129 PIN1-GFP and PIN2-VENUS signals in the cotyledon epidermal cells (Fig. 2C), therefore we suggest that the auxin  
130 distribution in cotyledon cells by PIN1 and PIN2 is likely processed in a polar auxin transport-independent manner.  
131 To investigate effect of the PIN carriers on the capacity of SE, we assessed the effect of *pin2* mutant on the capacity  
132 embryo induction by IAA and IAA/NPA. Our experiments showed that *pin2* IZEs produced significantly more  
133 number of embryo than wild type IAA/NPA treatments, whereas it has no effect the capacity of SE by IAA at absent  
134 of NPA (Fig. 2D). To know whether increase in the number embryos in *pin2* mutant is related to the depletion of  
135 IAA by PIN2 in the cotyledon cells on day 1-4 of culture, the *pin2* and wild type IZEs first were incubated on  
136 medium containing IAA without NPA for 4 days then were transformed to medium containing IAA with NPA.  
137 Although the early incubation of IZEs to medium containing only IAA led to significant decrease the number  
138 embryos of the *pin2* and wild type IZEs (Fig. 2E), *pin2* IZEs was less sensitive to this early incubation than wild  
139 type (Fig. 2E). Therefore increase in the number embryos in *pin2* mutant is associated to less depletion of IAA in the  
140 cotyledon epidermal cells on 1-4 day-old IZEs.

141 To find out whether the other auxin efflux transports might also be involved in reduced capacity of IAA-induced SE,  
142 we assessed the capacity of somatic embryo induction by IAA and IAA/NPA in *ABCBI*, *ABCBI9* and *ABCBI*  
143 *ABCBI9* mutants. The single mutant *ABCBI*, *ABCBI9* did not showed significantly different in the number of  
144 embryo induced by IAA/NPA and IAA than wild (Fig. 2F), whereas double mutant *ABCBI ABCBI9* IZEs promotes  
145 SE in both IAA/NPA and IAA treatments (Fig. 2F). This result indicates that ABCB-mediated auxin efflux also  
146 reduces the capacity of IAA to induce SE.

147

#### 148 **Natural auxin-induced somatic embryos show improved seedling conversion**

149 At stage of convention somatic embryo to seedling, we noticed efficient shoot development from embryos induced  
150 by the natural auxins in the presence of NPA than 2,4-D (Supplementary fig. 2). To monitor this remarkable embryo  
151 convention, we first isolated the single full-developed embryos (Fig. 3A) induced by the natural auxins or 2,4-D,  
152 then we assessed the convention of these single embryos transferred into new medium. Importantly, all somatic  
153 embryos induced by the natural auxins in the presence of NPA showed a normal embryo to seedling conversion  
154 (Fig. 3C,D), whereas for the 2,4-D system this was limited to 50-60% of the embryos (Fig. 3B,D) with less  
155 synchronized growth of shoot among seedlings (Fig. 3B) and less synchronized flowering timing of plants in soli  
156 (Supplementary fig. 3).

157 We also assessed the convention efficiency of somatic embryos induced from *Camelina sativa* IZEs by 2,4-D in  
158 compared with 4-Cl-IAA/NPA. Similar to Arabidopsis, the most of somatic embryos induced by 4-Cl-IAA showed a  
159 normal embryo to seedling conversion (Fig. 3F,G), whereas for the 2,4-D was limited to 30-40% of the embryos  
160 (Fig. 2E,G).

161 Low rate of somatic embryo convention induced by 2,4-D and high variation in the growth pattern among plants  
162 derived-somatic embryos, has been reported in many plant species (Garcia *et al.*, 2019). Based on these data we  
163 conclude, that the efficiency of SE-based plant propagation can be significantly improved by applying the natural  
164 auxins in the presence of the auxin transport inhibitor NPA.

165

#### 166 **Improvement of de novo shoot regeneration capacity by auxin transport inhibition**

167 De novo shoot regeneration is a two-step regeneration process: inducing pluripotent callus from explants on a auxin-  
168 rich callus-inducing medium (CIM) then inducing apical meristems from the callus on a cytokinin-rich shoot-  
169 inducing medium (SIM). To determine whether de novo shoot regeneration can also be improved by applying  
170 natural or synthetic auxins in the presence of NPA, the capacity of shoot regeneration were tested in callus induced  
171 in hypocotyl and cotyledons of *Brassica napus* seedlings by 2,4-D and 4-CL-IAA in the presence of NPA. The  
172 analysis showed that present of NPA in 2,4-D-CIM significantly decreases and increases the capacity of shoot  
173 regeneration of callus from hypocotyls and cotyledons respectively (Fig. 4A-C), while addition of NPA to 4-CL-  
174 IAA-CIM resulted in very effective regeneration of callus from both hypocotyls and cotyledons (Fig. 4A-C). These

175 results indicate that the auxin transport inhibition can also promote the regeneration capacity of callus induced either  
176 by synthetic or natural auxins.

177 We also noticed early appearing of shoot buds on callus induced by 4-CL-IAA than 2,4-D ([Supplementary fig. 4](#))  
178 which this can allow to develop a faster regeneration protocol for *B. napus* by natural auxins. In addition, we  
179 observed a better elongation of shoots formed on callus induced by 4-CL-IAA than 2,4-D. To monitor this, we  
180 isolated the shoot buds formed on callus induced by 4-CL-IAA than 2,4-D, then we assessed the growth of these  
181 shoots in a free hormone medium. Importantly, the shoots induced by 4-CL-IAA showed synchronized growth than  
182 2,4-D ([Supplementary fig. 5](#)). Based on these data we conclude, that the efficiency of shoot regeneration-based plant  
183 propagation can be significantly improved by applying the natural auxins.

184

185

## 186 **Materials and methods**

### 187 **Plant material and growth conditions**

188 All *Arabidopsis thaliana* lines used in this study were in the Columbia (Col-o) background. The transgenic lines  
189 *pDR5:GFP* (Ottenschläger *et al.*, 2003), *pWOX2:NLS-YFP* (Breuninger *et al.*, 2008), *pPIN1:PIN1-YFP* (Benkova *et*  
190 *al.*, 2003) and *pPIN2:PIN2-VENUS* (Blakeslee *et al.*, 2007) have been described previously. *abcb1*, *abcb19*, and  
191 *abcb1abcb19* plant lines were obtained from the Nottingham Arabidopsis Stock Centre (NASC). Seeds were  
192 sterilized in 10 % (v/v) sodium hypochlorite for 12 minutes and then washed four times in sterile water. Sterilized  
193 seeds were plated on half MS medium (Murashige and Skoog, 1962) containing 1 % (w/v) sucrose and 0.7 % agar.  
194 Seedlings, plants, and explants were grown at 21°C, 70% relative humidity and 16 hours photoperiod.

195

### 196 **Somatic embryogenesis**

197 For the isolation of IZEs at the bent cotyledon stage of development, siliques were harvested 10-12 days after  
198 pollination, sterilized in 10 % (v/v) sodium hypochlorite for 7 minutes and then washed four times in sterile water.  
199 IZEs were dissected from the siliques inside a laminar flow cabinet (Gaj, 2001). For induced SE, IZEs were cultured  
200 on solid B5 medium supplemented with 2,4-D, IAA, 4-Cl-IAA, IBA, PA, picloram and dicamba with or without  
201 NPA, 2 % (w/v) sucrose and 0.7 % agar (Sigma) for 2 weeks. Subsequently, the embryonic structures were allowed  
202 to develop further by transferring the explants to half MS medium with 1 % (w/v) sucrose and 0.7 % agar (Sigma)  
203 without hormones. One week after subculture, the capacity to induce SE was scored under a stereomicroscope as the  
204 number of somatic embryos produced from IZEs per plate. Four plates were scored for each experiment.

205

### 206 **Shoot regeneration**

207 Brassica napus cultivar wstar was used in this study. Seeds were sterilized in 10 % (v/v) sodium hypochlorite for 12  
208 minutes and then washed four times in sterile water. Sterilized seeds were plated on half MS medium containing 1  
209 % (w/v) sucrose and 0.7 % agar without plant growth regulators. Hypocotyl explants were excised from 7-day-old  
210 seedlings and cultured on MS solid media supplemented with 1% sucrose and with 2,4-D, 4-Cl-IAA with or without  
211 NPA. The explants were transferred into MS solid media supplemented 6-Benzylaminopurine (BA) for shoot  
212 regeneration. 3 weeks after transferring explants, the capacity shoot regeneration was scored under a  
213 stereomicroscope as the number of number shoots produced from hypocotyl per plates. Four plates were scored for  
214 each experiment.

215

### 216 **GUS Staining**

217 Histochemical staining of transgenic lines expressing the  $\beta$ -glucuronidase (GUS) reporter for GUS activity was  
218 performed as described previously (Anandalakshmi *et al.*, 1998) for 4 hours at 37 °C, followed by rehydration in a  
219 graded ethanol series (75, 50, and 25 %) for 10 minutes each.

220

### 221 **Microscopy**

222 GUS-stained tissues and cultured IZE explants were observed and photographed using a LEICA MZ12 microscope  
223 (Switzerland) equipped with a LEICA DC500 camera.

224 Confocal Laser Scanning Microscopy (CSLM) was performed with a ZEISS-003-18533. GFP and YFP were  
225 detected using a 534 nm laser, a 488 nm LP excitation filter and a 500-525 nm band pass emission filter.  
226 Simultaneously, background fluorescence (of e.g. chlorophyll) was detected with a 650nm long pass emission filter.  
227 Images were captured with ZEISS ZEN2009 software. Unmodified images were cropped (if needed) and used for  
228 assembly into figures in MS Powerpoint. Assembled figures were saved as pdf files and converted to tif files in  
229 Adobe Photoshop.

230  
231

## 232 References

233

234 **Adamowski, M. and Friml, J.** (2015) PIN-dependent auxin transport: Action, regulation, and evolution. *Plant Cell*,  
235 **27**, 20–32.

236 **Anandalakshmi, R., Pruss, G. J., Ge, X., Marathe, R., Mallory, A. C., Smith, T. H., and Vance, V.B.** (1998) A  
237 viral suppressor of gene silencing in plants. *Proc. Natl. Acad. Sci.*, **95**, 13079–13084.

238 **Benkova, E., Michniewicz, M., Sauer, M., Teichmann, T. and Pflanz, M. Der** (2003) Local , efflux-dependent  
239 auxin gradients as a common module for plant organ formation. *Cell*, **115**, 591–602.

240 **Blakeslee, J.J., Bandyopadhyay, A., Ok, R.L., et al.** (2007) Interactions among PIN-FORMED and P-  
241 glycoprotein auxin transporters in Arabidopsis. *Plant Cell*.

242 **Breuninger, H., Rikirsch, E., Hermann, M., Ueda, M. and Laux, T.** (2008) Differential expression of WOX  
243 genes mediates apical-basal axis formation in the Arabidopsis embryo. *Dev. Cell*, **14**, 867–876. Available at:  
244 <http://www.ncbi.nlm.nih.gov/pubmed/18539115> [Accessed January 23, 2014].

245 **Eyer, L., Vain, T., Pařízková, B., et al.** (2016) 2,4-D and IAA amino acid conjugates show distinct metabolism in  
246 Arabidopsis. *PLoS One*.

247 **Friml, J.** (2010) Subcellular trafficking of PIN auxin efflux carriers in auxin transport. *Eur. J. Cell Biol.*, **89**, 231–  
248 235. Available at: <http://www.ncbi.nlm.nih.gov/pubmed/19944476> [Accessed August 16, 2016].

249 **Gaj, M.D.** (2001) Direct somatic embryogenesis as a rapid and efficient system for in vitro regeneration of  
250 Arabidopsis thaliana. *Plant Cell. Tissue Organ Cult.*, **64**, 39–46.

251 **Ganguly, A., Lee, S.H., Cho, M., Lee, O.R., Yoo, H. and Cho, H.T.** (2010) Differential auxin-transporting  
252 activities of PIN-FORMED proteins in arabidopsis root hair cells. *Plant Physiol*.

253 **Garcia, C., Furtado de Almeida, A.A., Costa, M., Britto, D., Valle, R., Royaert, S. and Marelli, J.P.** (2019)  
254 Abnormalities in somatic embryogenesis caused by 2,4-D: an overview. *Plant Cell. Tissue Organ Cult.*, **137**,  
255 193–212. Available at: <http://dx.doi.org/10.1007/s11240-019-01569-8>.

256 **Geisler, M., Aryal, B., Donato, M. Di and Hao, P.** (2017) A critical view on ABC transporters and their  
257 interacting partners in auxin transport. *Plant Cell Physiol.*, **58**, 1601–1604.

258 **Geisler, M. and Murphy, A.S.** (2006) The ABC of auxin transport: The role of p-glycoproteins in plant  
259 development. *FEBS Lett*.

260 **Kierzkowski, D., Lenhard, M., Smith, R. and Kuhlemeier, C.** (2013) Interaction between meristem tissue layers  
261 controls phyllotaxis. *Dev. Cell*, **26**, 616–628. Available at: <http://www.ncbi.nlm.nih.gov/pubmed/24091013>  
262 [Accessed August 16, 2016].

263 **Mravec, J., Skůpa, P., Bailly, A., et al.** (2009) Subcellular homeostasis of phytohormone auxin is mediated by the  
264 ER-localized PIN5 transporter. *Nature*.

265 **Murashige, T. and Skoog, F.** (1962) A revised medium for rapid growth and bio assays with tobacco tissue  
266 cultures. *Physiol. Plant.*, **15**, 473–497.

267 **Ottenschläger, I., Wolff, P., Wolverton, C., Bhalerao, R.P., Sandberg, G., Ishikawa, H., Evans, M. and Palme,  
268 K.** (2003) Gravity-regulated differential auxin transport from columella to lateral root cap cells. *Proc. Natl.  
269 Acad. Sci. U. S. A.*, **100**, 2987–2991.

270 **Paque, S. and Weijers, D.** (2016) Q&A: Auxin: The plant molecule that influences almost anything. *BMC Biol.*,  
271 **14**, 1–5. Available at: <http://dx.doi.org/10.1186/s12915-016-0291-0>.

272 **Péret, B., Swarup, K., Ferguson, A., et al.** (2012) AUX/LAX genes encode a family of auxin influx transporters  
273 that perform distinct functions during Arabidopsis development. *Plant Cell*, **24**, 2874–2885. Available at:  
274 <http://www.pubmedcentral.nih.gov/articlerender.fcgi?artid=3426120&tool=pmcentrez&rendertype=abstract>  
275 [Accessed August 16, 2016].

276 **Pufky, J., Qiu, Y., Rao, M. V., Hurban, P. and Jones, A.M.** (2003) The auxin-induced transcriptome for etiolated  
277 Arabidopsis seedlings using a structure/function approach. *Funct. Integr. Genomics*.

- 278 **Rakusová, H., Abbas, M., Han, H., Song, S., Robert, H.S. and Friml, J.** (2016) Termination of Shoot Gravitropic  
279 Responses by Auxin Feedback on PIN3 Polarity. *Curr. Biol.*
- 280 **Robert, H.S., Grones, P., Stepanova, A.N., Robles, L.M., Lokerse, A.S., Alonso, J.M., Weijers, D. and Friml,**  
281 **J.** (2013) Local auxin sources orient the apical-basal axis in Arabidopsis embryos. *Curr. Biol.*, **23**, 2506–2512.  
282 Available at: <http://www.ncbi.nlm.nih.gov/pubmed/24291089> [Accessed January 28, 2014].
- 283 **Swarup, R. and Bhosale, R.** (2019) Developmental roles of AUX1/LAX auxin influx carriers in plants. *Front.*  
284 *Plant Sci.*, **10**, 1–14.
- 285 **Tan, X., Calderon-Villalobos, L.I.A., Sharon, M., Zheng, C., Robinson, C. V., Estelle, M. and Zheng, N.**  
286 (2007) Mechanism of auxin perception by the TIR1 ubiquitin ligase. *Nature*.
- 287 **Teale, W. and Palme, K.** (2018) Naphthylphthalamic acid and the mechanism of polar auxin transport. *J. Exp. Bot.*
- 288 **Vanneste, S. and Friml, J.** (2009) Auxin: a trigger for change in plant development. *Cell*, **136**, 1005–1016.  
289 Available at: <http://www.ncbi.nlm.nih.gov/pubmed/19303845> [Accessed July 16, 2014].
- 290 **Yang, H. and Murphy, A.S.** (2009) Functional expression and characterization of Arabidopsis ABCB, AUX 1 and  
291 PIN auxin transporters in *Schizosaccharomyces pombe*. *Plant J.*
- 292

293  
294

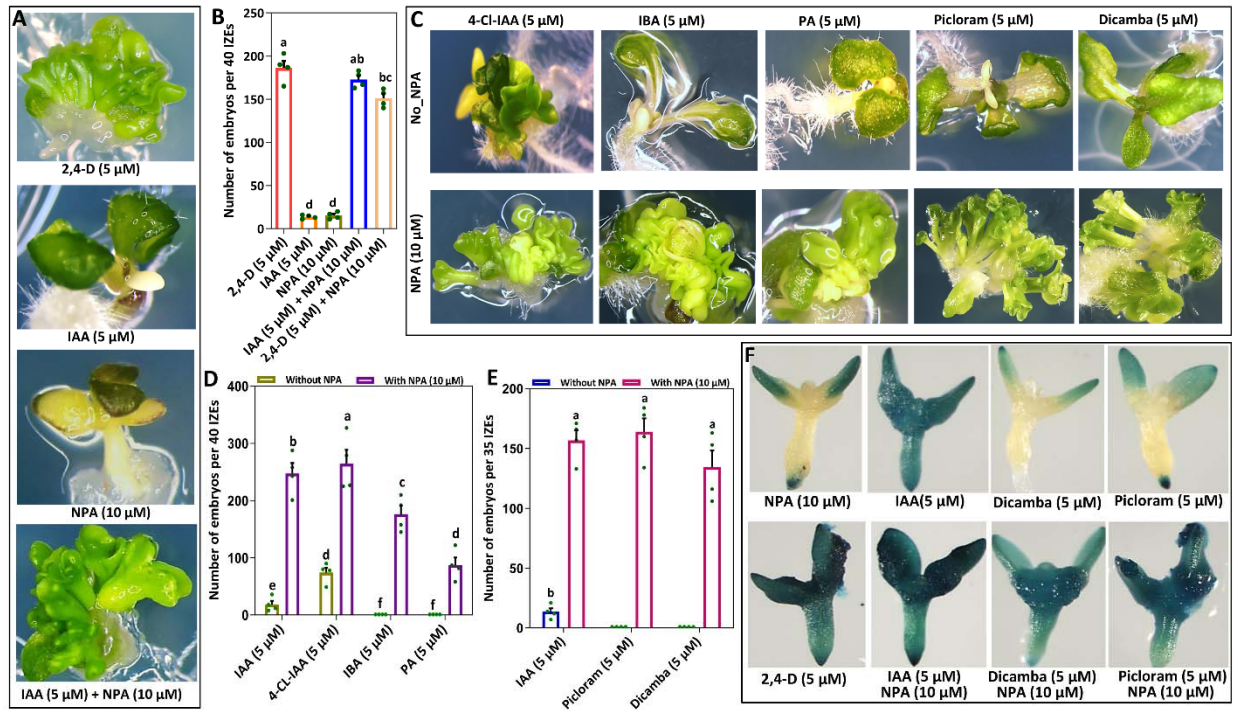

295  
296  
297  
298  
299  
300  
301  
302  
303  
304  
305  
306  
307  
308  
309  
310  
311  
312  
313  
314  
315

**Figure 1. The auxin transport inhibitor NPA enhances the SE- and auxin response inducing capacity of natural and synthetic auxins in Arabidopsis.** (A) The typical phenotype of an Arabidopsis immature zygotic embryo (IZE) grown for two weeks on medium supplemented with 2,4-D, IAA, NPA, or IAA and NPA, and subsequently cultured for 1 week on hormone-free medium for embryo development. (B) The number of somatic embryos per 40 IZEs that were grown for two weeks on medium supplemented with 2,4-D, IAA, NPA, IAA and NPA or 2,4-D and NPA, and subsequently cultured for 1 week on hormone-free medium. (C) The phenotype of somatic embryos formed on cotyledons of IZEs that were grown for two weeks on medium supplemented with 4-CL-IAA, IBA, PA, picloram or dicamba without NPA (upper panel) or with NPA (lower panel), and subsequently cultured for 1 week on hormone-free medium. (D, E) The number of somatic embryos per 40 IZEs (D) or 35 IZEs (E) that were grown for two weeks on medium supplemented with IAA, 4-CL-IAA, IBA, PA (D) or with IAA, picloram and dicamba (E) without NPA or with NPA, and subsequently cultured for 1 week on hormone-free medium. The dots in B, D and E indicate the number somatic embryos produced per 40 or 35 IZEs (n=4 biological replicates), bars indicate the mean and error bars indicate s.e.m. and different letters indicate statistically significant differences ( $P < 0.001$ ) as determined by one-way analysis of variance with Tukey's honest significant difference post hoc test. (F) Expression pattern of the *pDR5:GUS* reporter in Arabidopsis IZEs cultured for 7 days on medium supplemented with NPA or 2,4-D, or with IAA, picloram or dicamba without or with NPA.



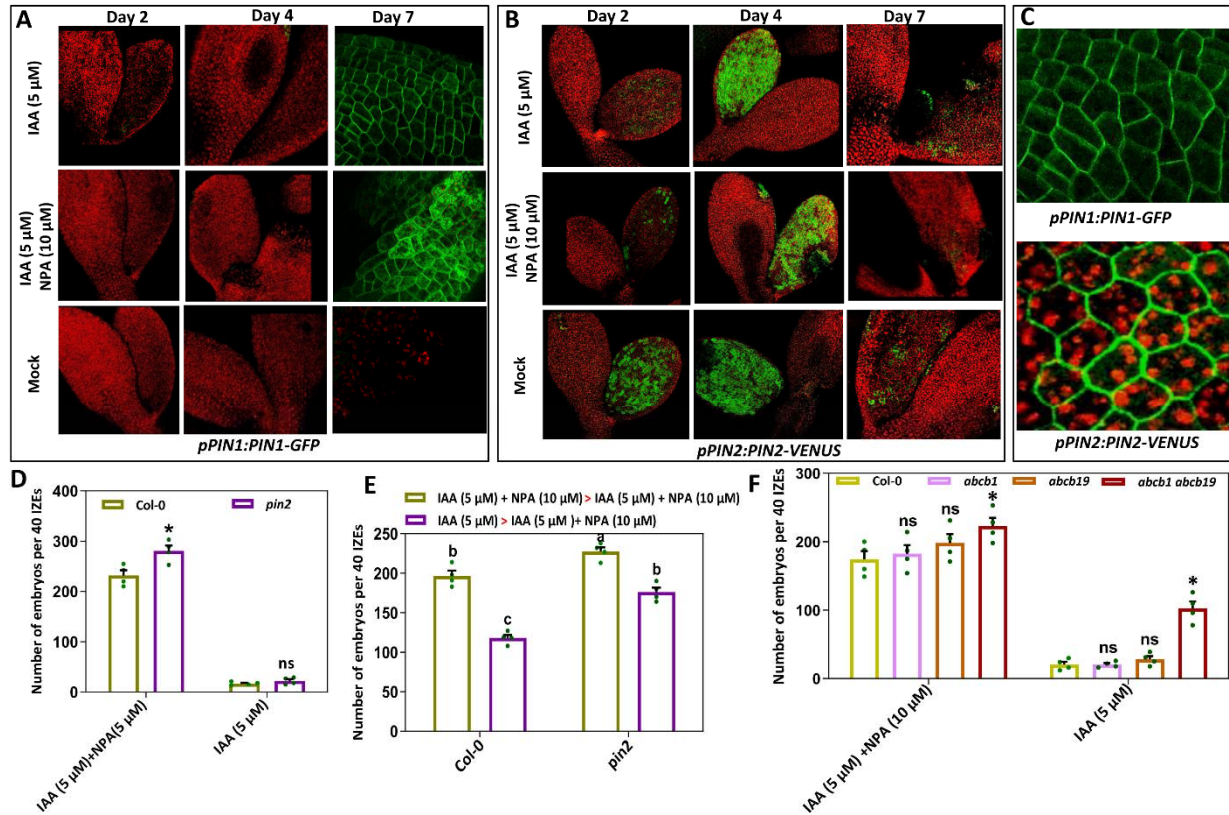

316  
 317 **Figure 2. PIN- and ABCB-mediated auxin efflux reduces the capacity of IAA to induce SE.** (A, B) The  
 318 expression patterns of *pPIN1:PIN1-GFP* (A) and *pPIN2:PIN2-VENUS* (B) in cotyledon of IZEs cultured for two, four  
 319 or seven days on medium supplemented with IAA (upper panel), with IAA and NPA (middle panel), or without any  
 320 addition (mock, lower panel). (C) Non-polar localization of PIN1-GFP (upper panel) and PIN2-VENUS (lower  
 321 panel) in cotyledon epidermis cells of IZEs after respectively seven and two days of culture. (D) The number of  
 322 somatic embryos per 40 wild-type or or *pin2* mutant IZEs that were first grown for two weeks on medium  
 323 supplemented with IAA or IAA and NPA, and subsequently cultured for 1 week on hormone-free medium for  
 324 embryo development. (E) Differential reduction in the number of somatic embryos formed on *pin2* IZEs compared  
 325 with wild type which were first grown for four days on medium supplemented with IAA and then transferred in to  
 326 medium supplemented IAA/NPA for 10 days. (F) The number of somatic embryos per 40 IZEs that were first grown  
 327 for two weeks on medium supplemented with IAA, and IAA/NPA, and subsequently cultured for 1 week on medium  
 328 without IAA and NPA at wild type, *abcbl*, *abcbl19*, *abcbl1 abcbl19* mutants. In D-F the dots indicate the number  
 329 somatic embryos produced per 40 IZEs (n=4 biological replicates), bars indicate the mean and error bars indicate  
 330 s.e.m. and the asterisk indicates a significant difference with wild-type ( $P < 0.01$ ) as determined by a two-sided  
 331 Student's *t*-test.  
 332

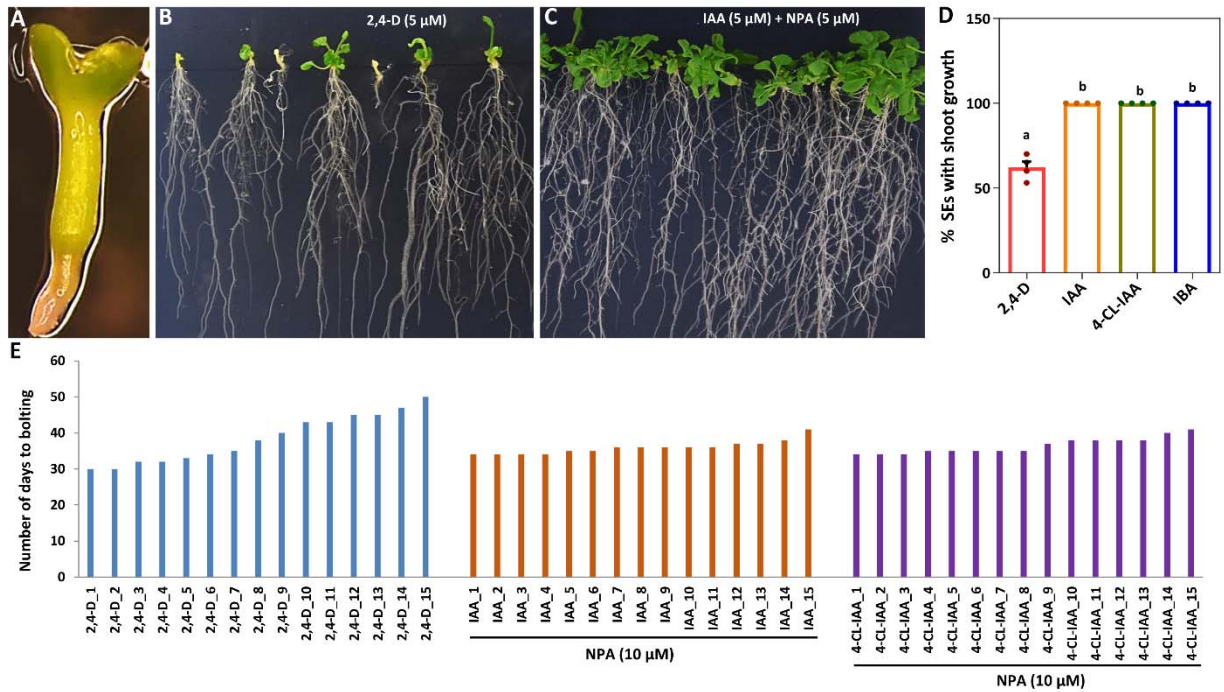

333  
 334 **Figure 3. Natural auxin-induced somatic embryos show improved seedling conversion** (A) The phenotype of a  
 335 single natural auxin or 2,4-D induced somatic embryo cultured on hormone-free medium for conversion to seedling.  
 336 (B,C) The phenotype of seedlings derived from somatic embryos induced on 2,4-D (B) or IAA and NPA containing  
 337 medium (C) after germination for 2 weeks on hormone-free medium. (D) The embryo to seedling conversion rate of  
 338 somatic embryos induced by 2,4-D, IAA and NPA, 4-CL-IAA and NPA or IBA and NPA 2 weeks after germination  
 339 on hormone-free medium. The dots indicate the percentage of 20 somatic embryos showing proper embryo to  
 340 seedling conversion (n=4 biological replicates), bars indicate the mean and error bars indicate s.e.m. and different  
 341 letters indicate statistically significant differences ( $P < 0.01$ ) as determined by one-way analysis of variance with  
 342 Tukey's honest significant difference post hoc test.  
 343

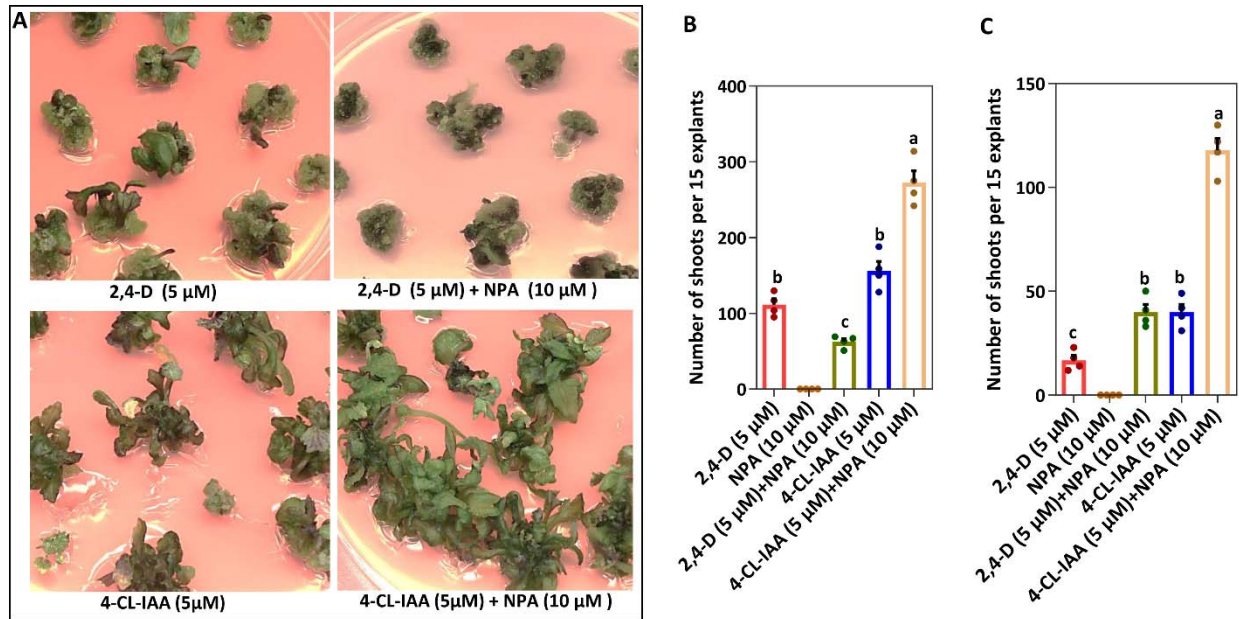

344

345 **Figure 4. The auxin transport inhibitor NPA enhances de novo shoot regeneration capacity in *Brassica napus*.**

346 (A) The phenotype of shoot formed on callus induced hypocotyls for 10 days on medium supplemented with 2,4-D,  
347 2,4-D/NPA, 4-Cl-IAA or 4-Cl-IAA /NPA, and subsequently cultured for 3 weeks on medium supplemented with 10  
348 μM 6-Benzylaminopurine (BA) for shoot regeneration. (B,C) The number of shoots formed on callus induced from  
349 15 hypocotyl (B) or 15 cotyledons (C) explants for 10 days on medium supplemented with 2,4-D, NPA, 2,4-D with  
350 NPA, 4-Cl-IAA or 4-Cl-IAA with NPA, and subsequently cultured for 3 weeks on medium supplemented with 10  
351 μM BA for shoot regeneration. The dots in B and C indicate the number of shoots produced per 15 explants (n=4  
352 biological replicates), bars indicate the mean and error bars indicate s.e.m. and different letters indicate statistically  
353 significant differences (P < 0.001) as determined by one-way analysis of variance with Tukey's honest significant  
354 difference post hoc test.

355

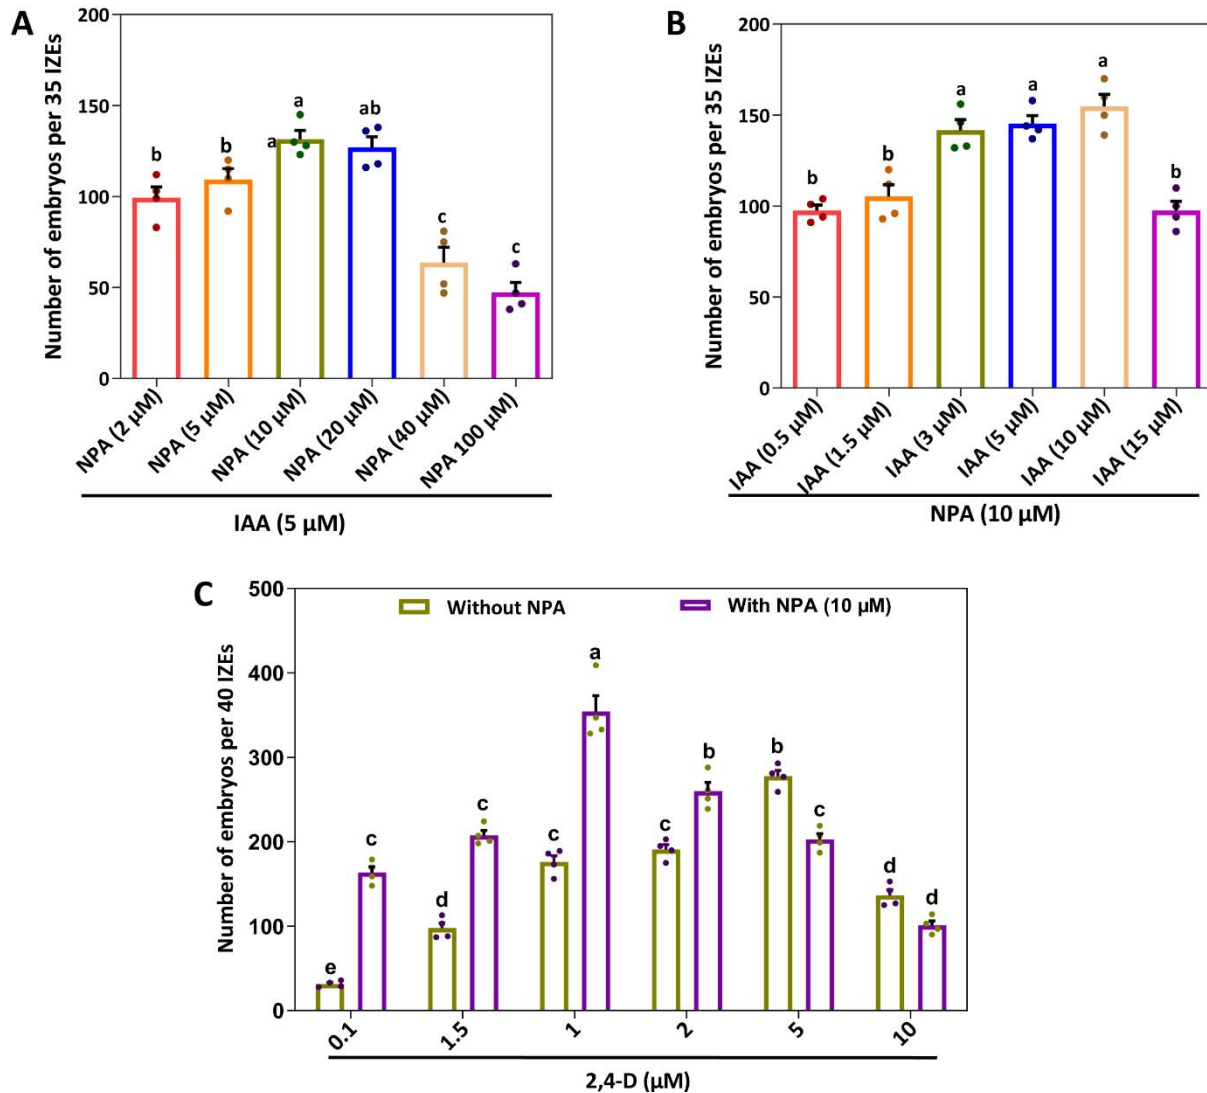

356

357 **Supplementary figure 1. Inhibition of auxin transport lowers the exogenous auxin concentration required for**

358 **efficient SE induction.** (A) Effect of different concentrations of NPA on the capacity to induce somatic embryos on

359 IZEs cultured on medium with IAA. (B) Effect of different concentrations of IAA on the capacity to induce somatic

360 embryos on IZEs cultured on medium with NPA. The dots in A, B indicate the number somatic embryos produced

361 per 35 IZEs (n=4 biological replicates), bars indicate the mean and error bars indicate s.e.m. and different letters

362 indicate statistically significant differences ( $P < 0.01$ ) as determined by one-way analysis of variance with Tukey's

363 honest significant difference post hoc test. (C) Effect of different concentrations of 2,4-D on the capacity to induce

364 somatic embryos on IZEs cultured on medium with and without NPA. The dots indicate the number somatic

365 embryos produced per 40 (n=4 biological replicates), bars indicate the mean and error bars indicate s.e.m. and the

366 asterisk indicates a significant difference ( $P < 0.01$ ) as determined by the two-sided Student's *t*-test.

367

368  
369

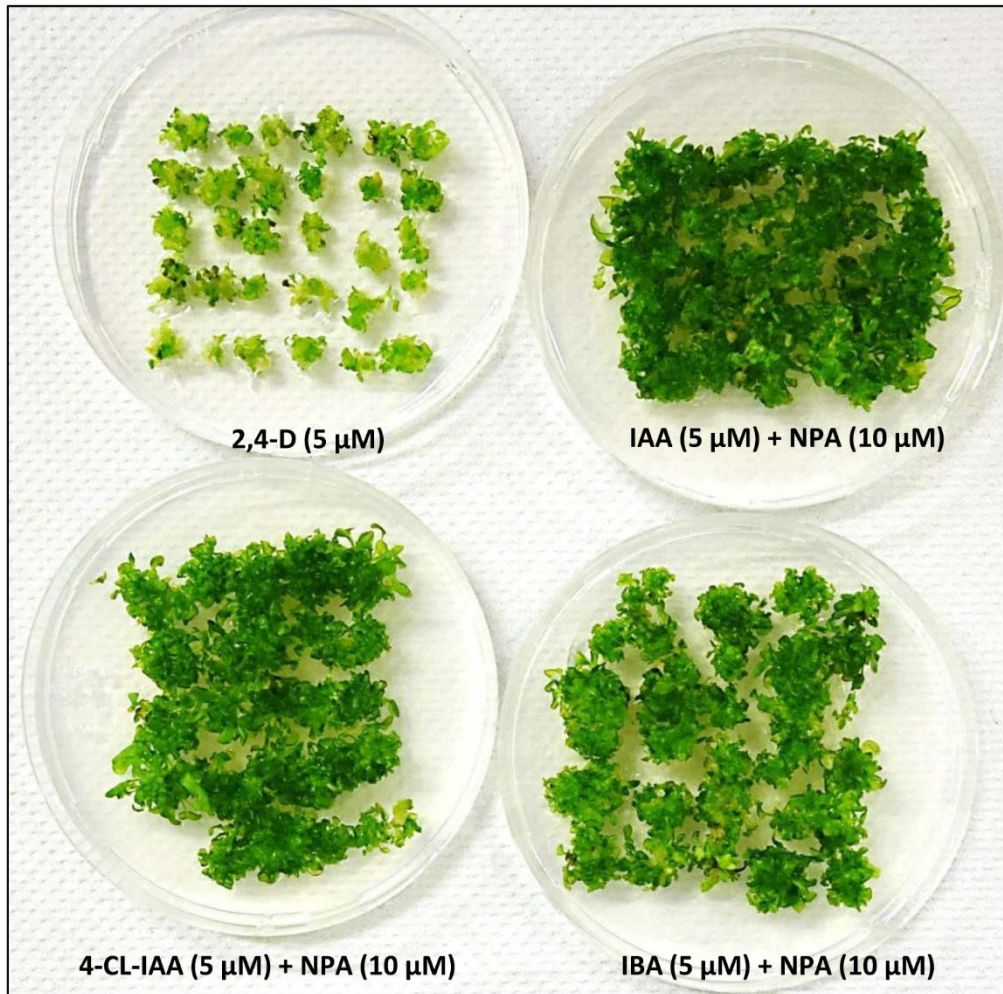

370  
371 **Supplementary figure 2. Natural auxin-induced somatic embryos show improved seedling conversion.** The  
372 phenotype of shoot derived from somatic embryos induced on 2,4-D, IAA/NPA, 4-CL-IAA/NPA or IBA/NPA  
373 containing medium after conversion for 2 weeks on hormone-free medium.  
374  
375

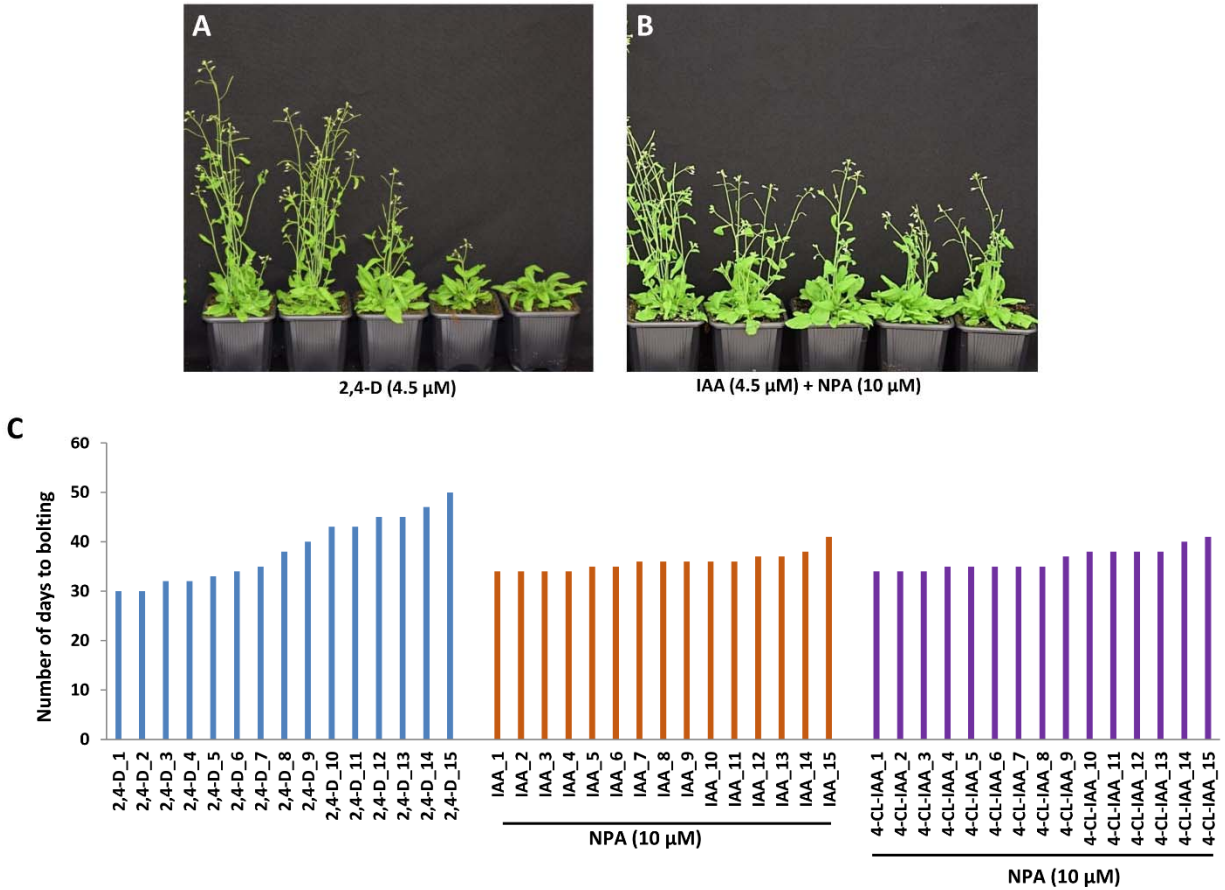

376

377 **Supplementary figure 3. Natural auxin-induced somatic embryos show improved plant development. (A, B)**

378 The shoot phenotypes of 45-day-old plants derived from somatic embryos induced by 2,4-D (A) and IAA/NPA (B).

379 (C) The number of days to bolting in plants derived from somatic embryos induced by 2,4-D, IAA/NPA, and 4-CL-

380 IAA/NPA.

381

382

383

384

385

386

387

388

389

390

391

392

393

394

395

396

397

398

399  
400

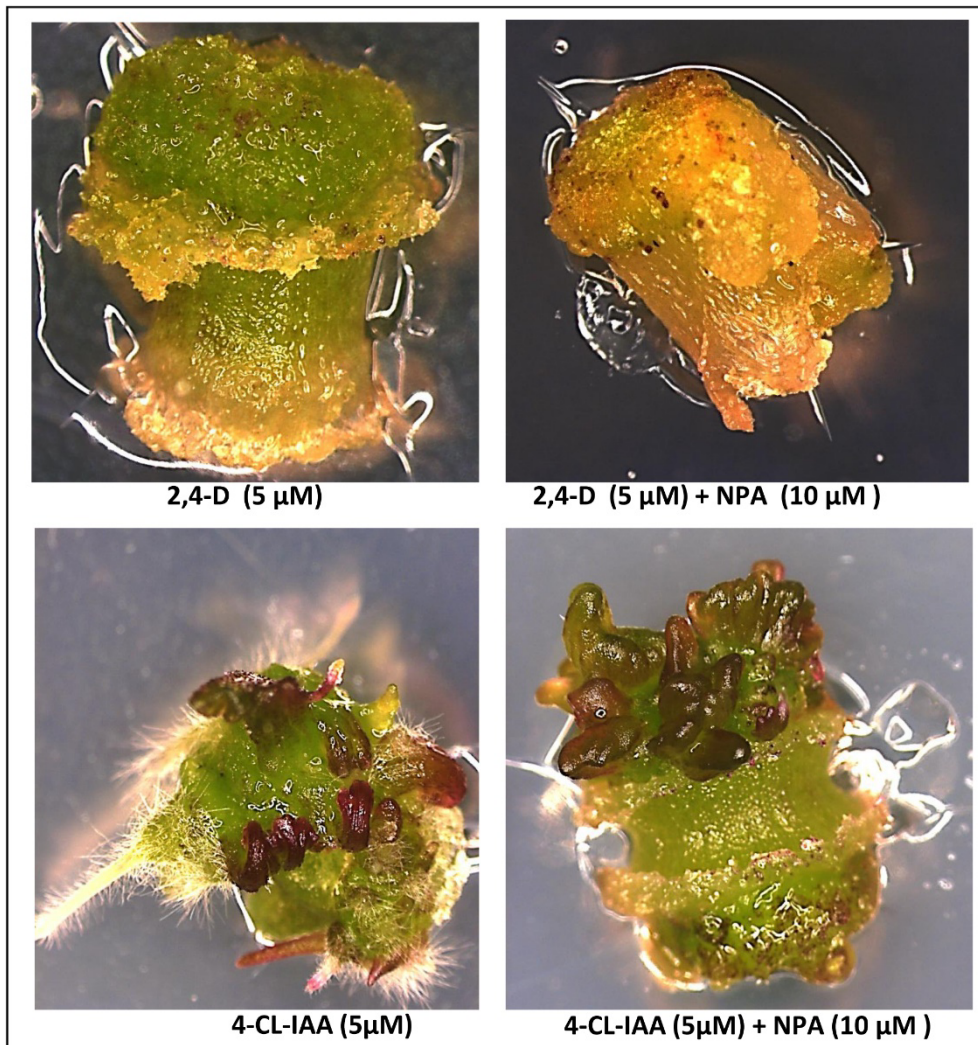

401  
402  
403  
404  
405  
406  
407  
408  
409  
410  
411  
412  
413  
414

**Supplementary figure 4. Acceleration in shoot buds formation on callus induced by 4-CL-IAA.** The phenotype of callus induced from hypocotyls by 2,4-D, 2,4-D/NPA, 4-Cl-IAA or 4-Cl-IAA /NPA, and subsequently cultured for 1 week on medium supplemented with 10  $\mu$ M 6-Benzylaminopurine (BA).

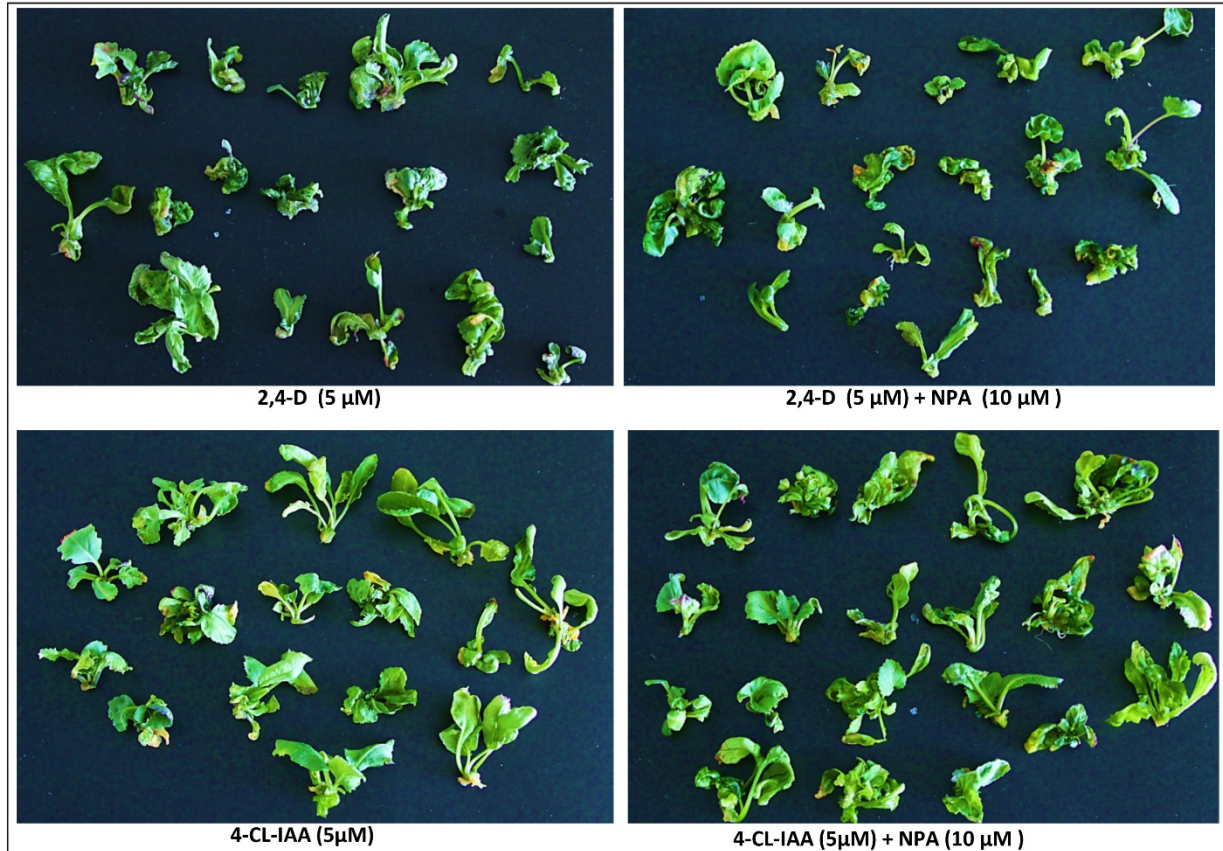

415  
416  
417  
418  
419  
420

**Supplementary figure 5. The shoot buds formed on callus induced by 4-CL-IAA shows synchronized growth than 2,4-D.** The phenotype of shoot derived from shoot buds formed on callus by 2,4-D, 2,4-D/NPA, 4-Cl-IAA or 4-Cl-IAA /NPA, for 2 weeks on hormone-free medium.
